# Supplementary material
Source: Springer Nature journal article supplement (https://www.springermedizin.de/resource/supplementary/12943_2013_1246_MOESM6_ESM.pdf/9552716)

**A.**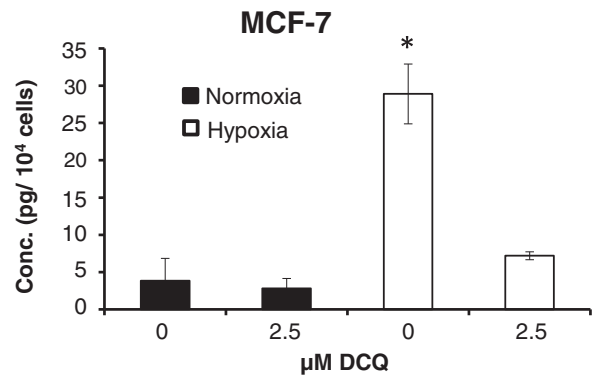**B.**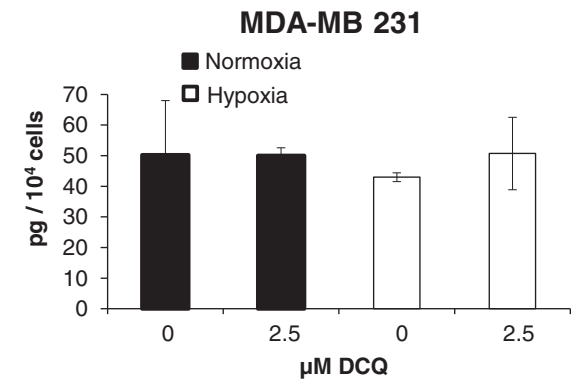**C.**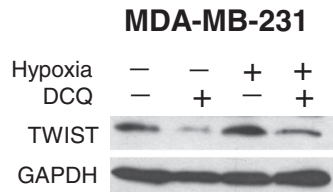**D.**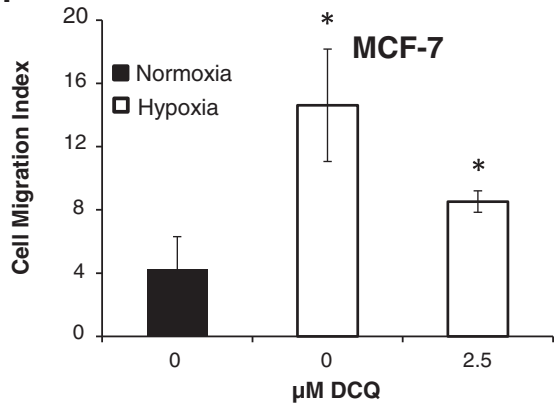

Supplement: MOESM6 [file 9552716]
